# Supplementary material for: Gadolinium-Based Paramagnetic Relaxation Enhancement Agent Enhances Sensitivity for NUS Multidimensional NMR-Based Metabolomics
Source: MDPI journal article supplement (doi:10.3390/molecules26175115), 2021-08-24
Supplement: s1 [file s1]

## Supplementary Figures

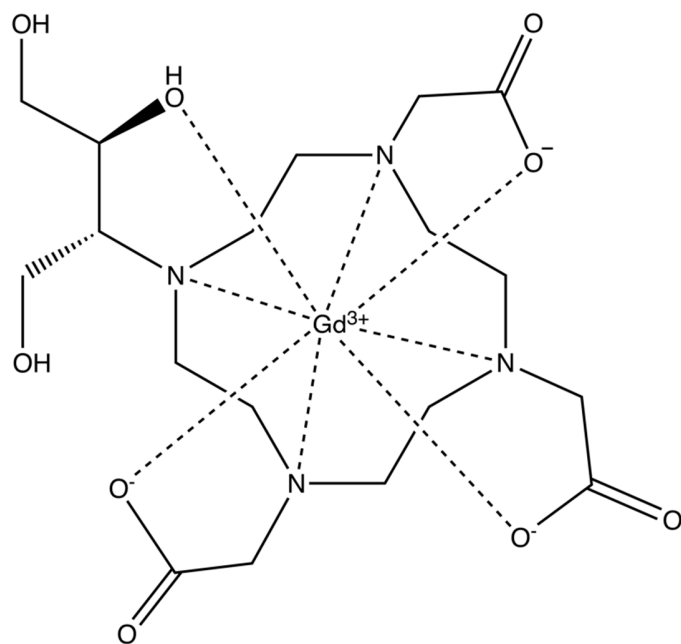

**Figure S1.** Chemical structure of Gadobutrol (Gd)

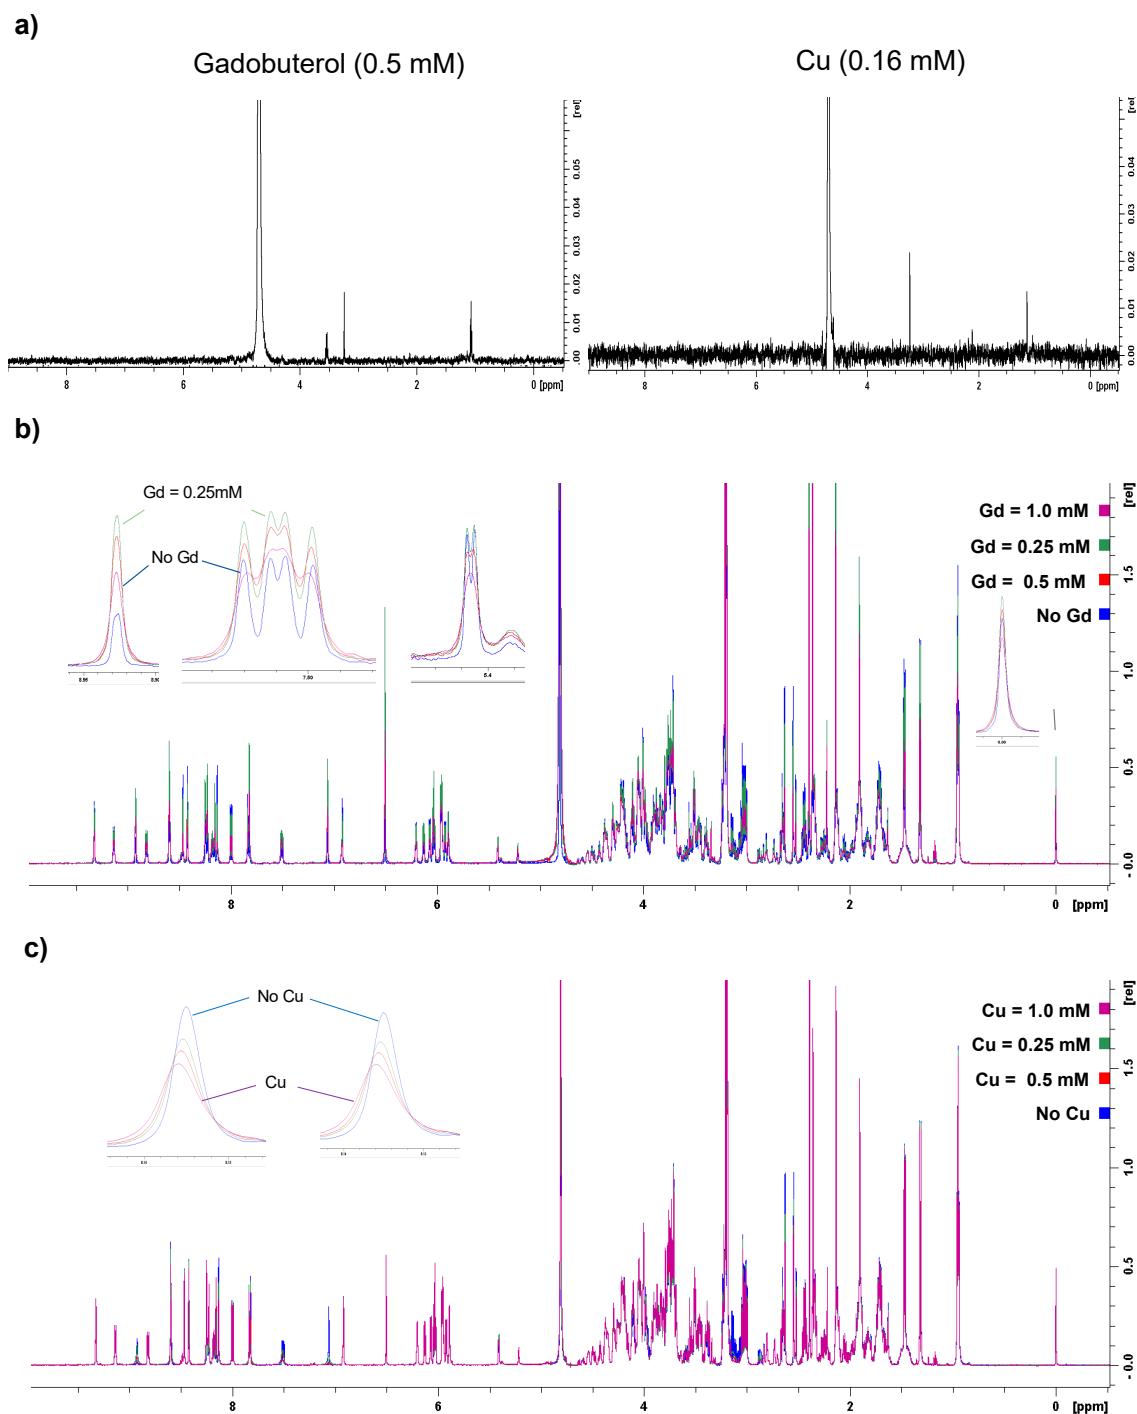

**Figure S2.** Effect of addition of relaxation agents on 1D  $^1\text{H}$  spectral intensity for a model mixture (Reference 1) of metabolites in time equivalent experiments, **a)** 1D spectra of Gadobutrol (Gd) (left) and Copper-EDTA (Cu) (right), **b)** 1D overlay of reference 1 at different Gd concentrations, **c)** 1D overlay of reference 1 at different Cu-EDTA

a)

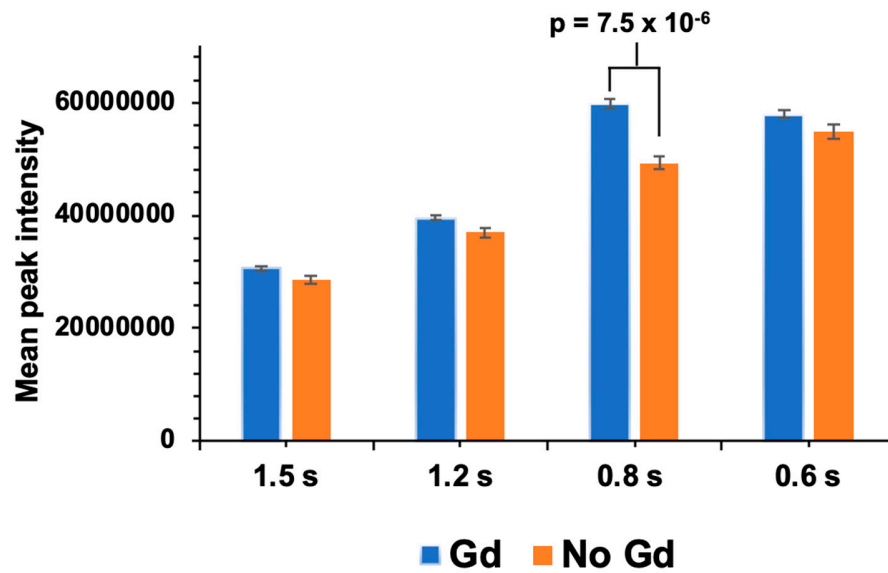

b)

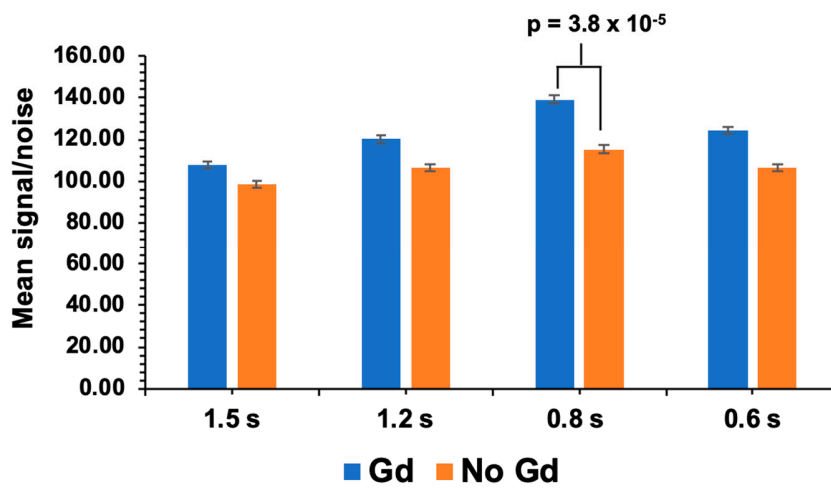

**Figure S3.** Plots showing (a) mean peak intensity and (b) mean S/N for Reference 1 with (blue) and without (orange) addition of Gadobutrol.

## 1. Glucose

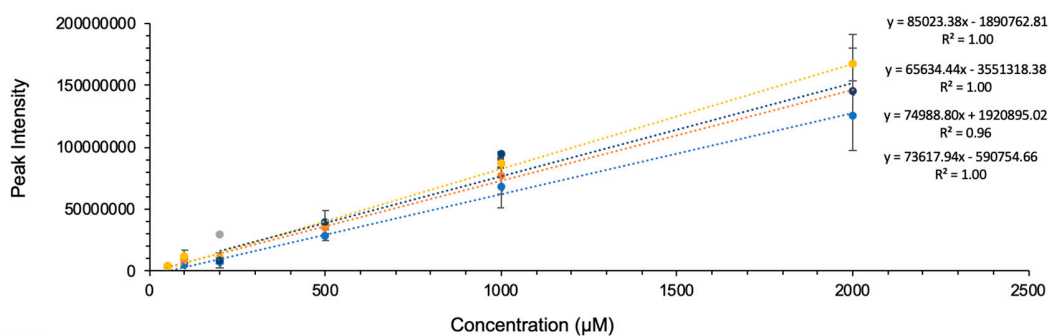

## 2. AMP

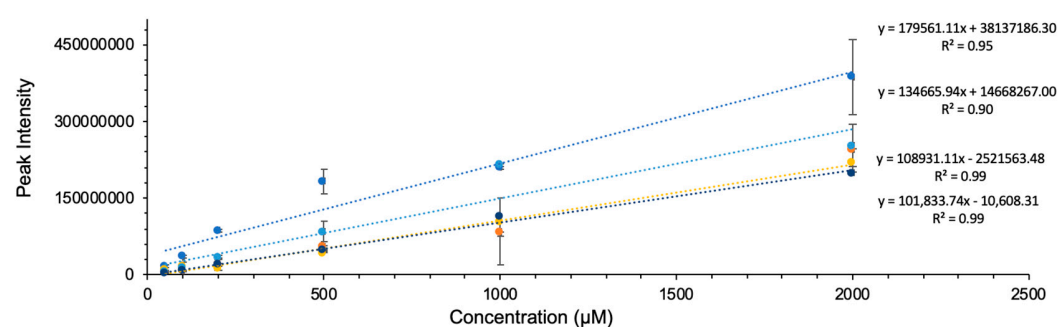

## 3. Alanine

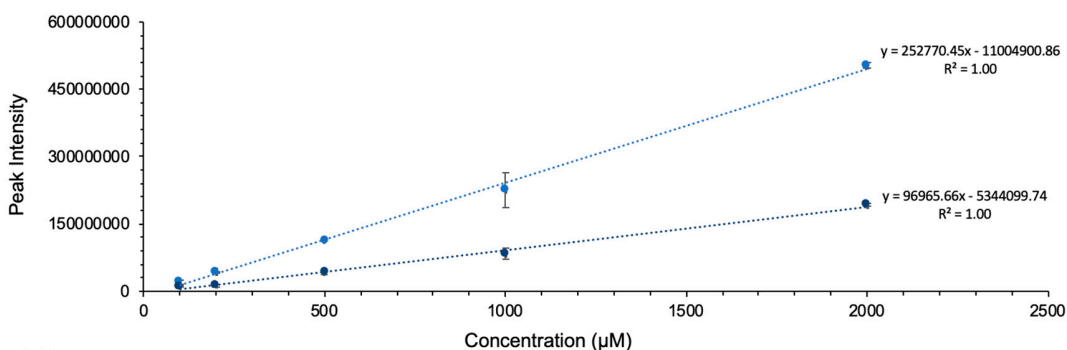

## 4. Cytidine

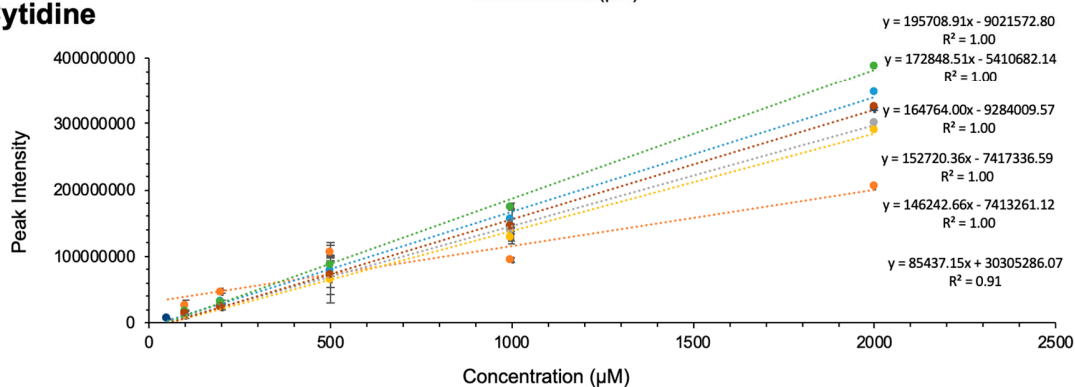

Figure S4. Linear regression curve of Reference 2 metabolites

## 5. Pyruvic acid

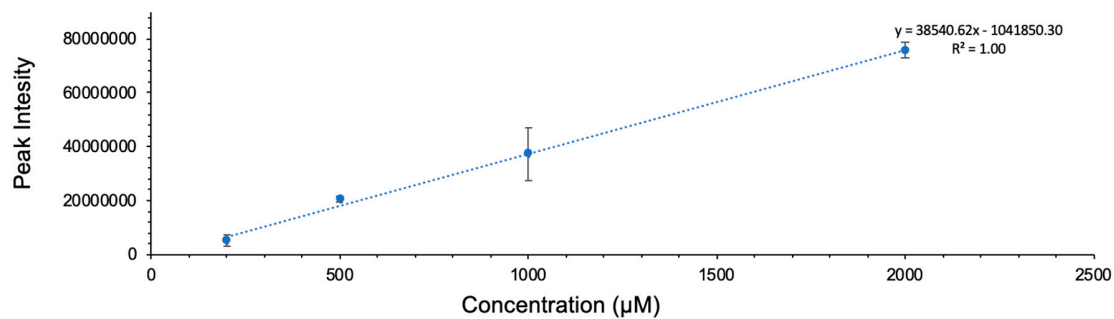

## 6. Glutamic acid

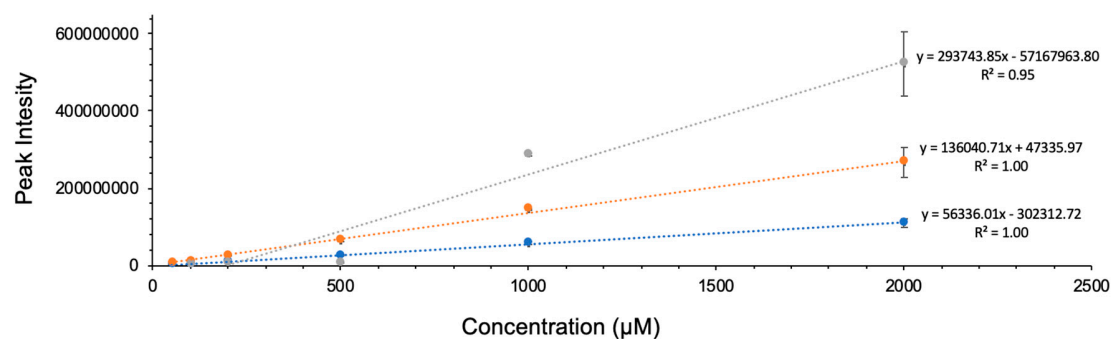

## 7. Succinic acid

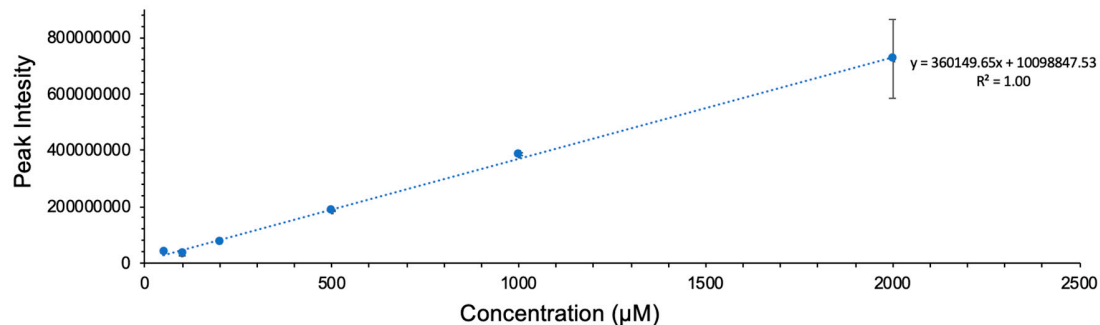

## 8. Fumaric acid

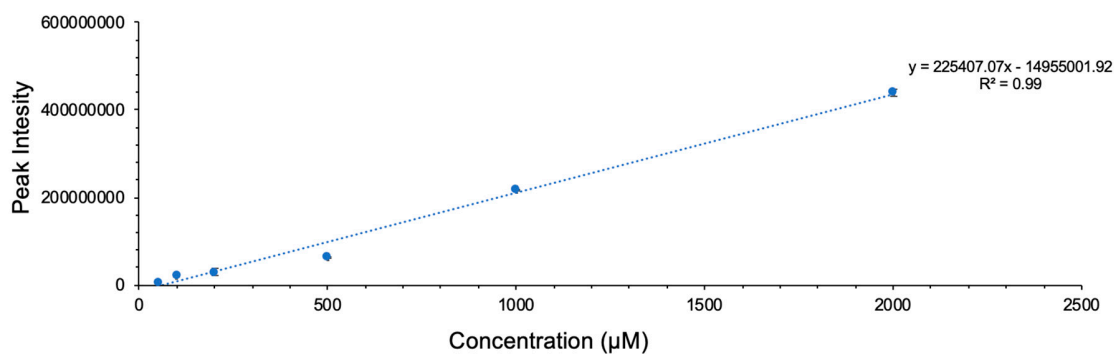

Figure S4. Linear regression curve of Reference 2 metabolites

### 9. Acetic acid

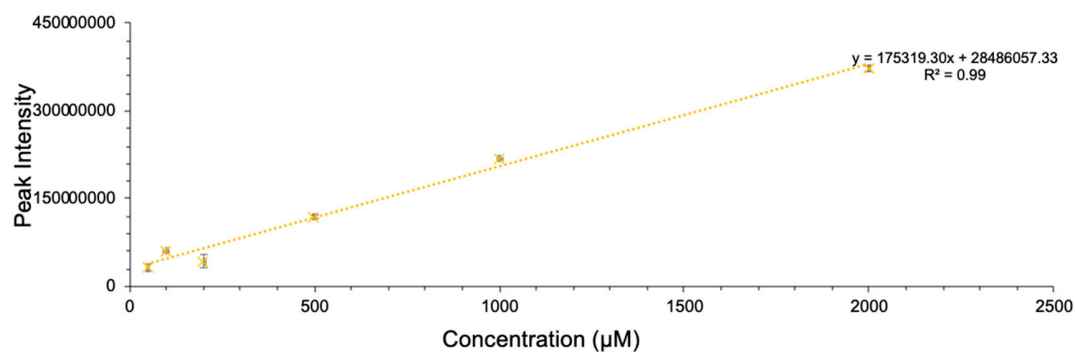

### 10. Citric acid

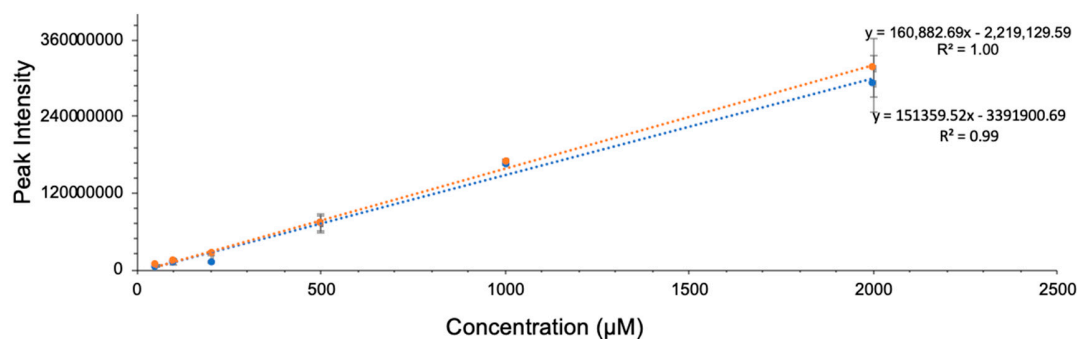

### 11. Maleic acid

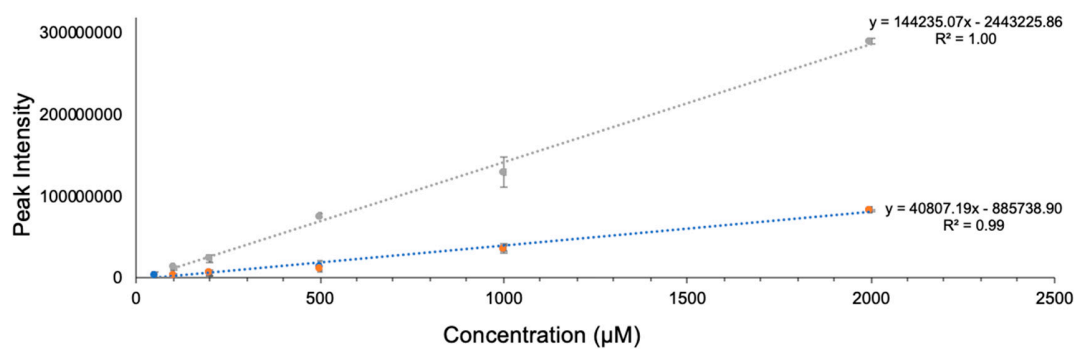

### 12. Lactic acid

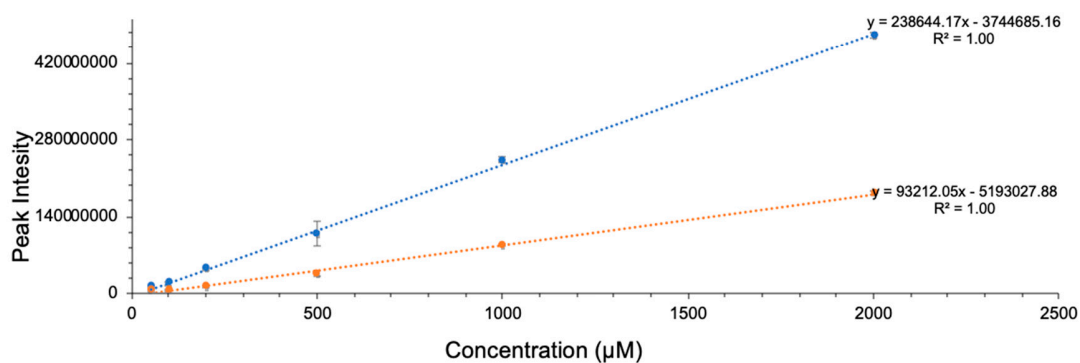

Figure S4. Linear regression curve of Reference 2 metabolites

### 13. Hydroxy Glutaric acid

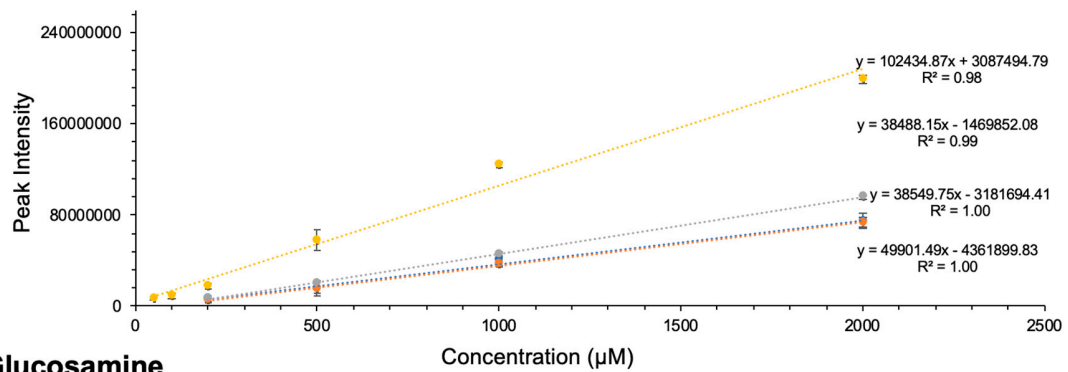

### 14. Glucosamine

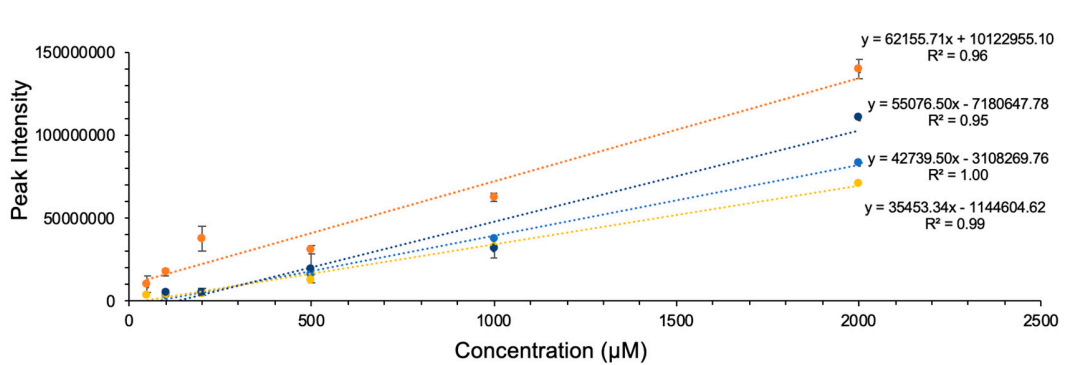

### 15. UDP

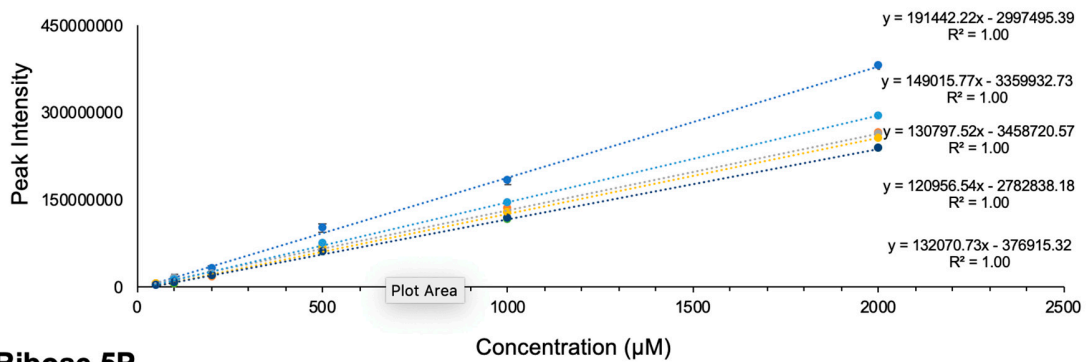

### 16. Ribose 5P

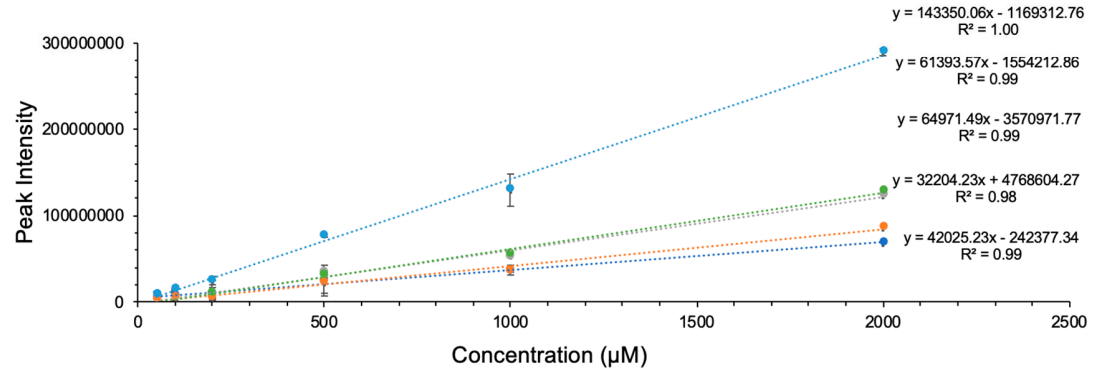

Figure S4. Linear regression curve of Reference 2 metabolites

### 17. Ornithine

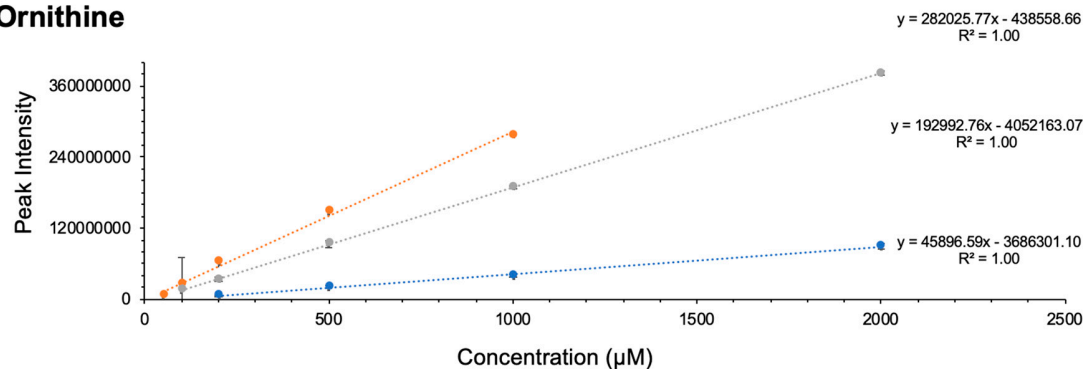

### 18. Glutamine

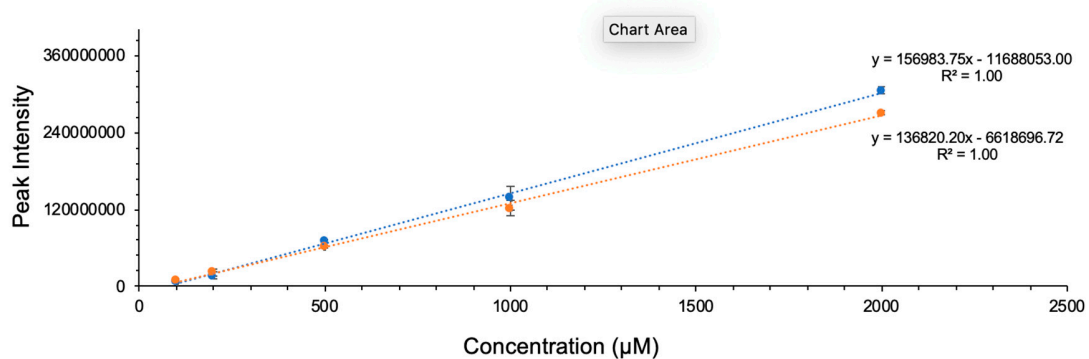

### 19. Arginine

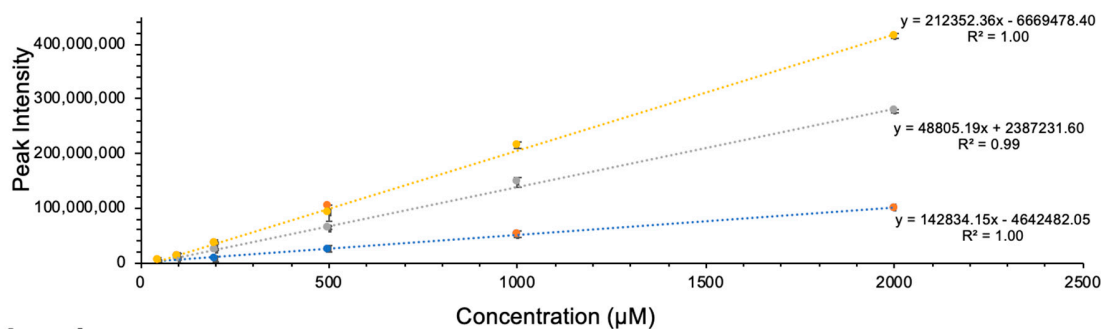

### 20. Leucine

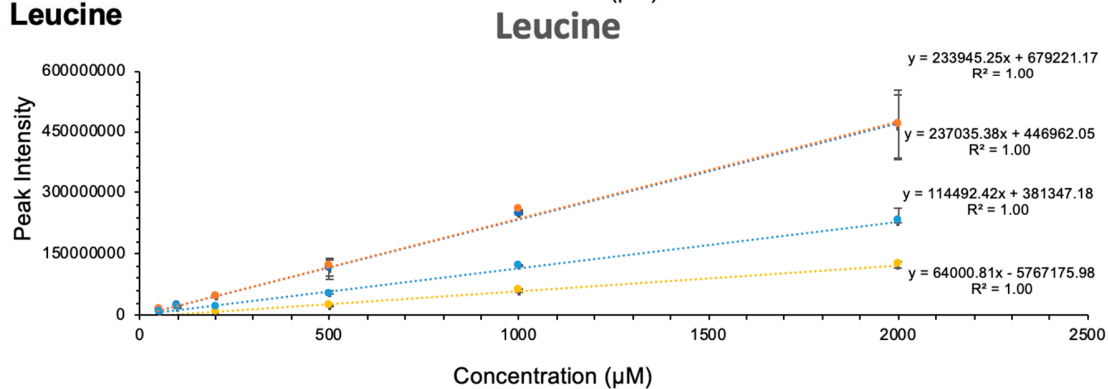

Figure S4. Linear regression curve of Reference 2 metabolites



## 21. Histidine

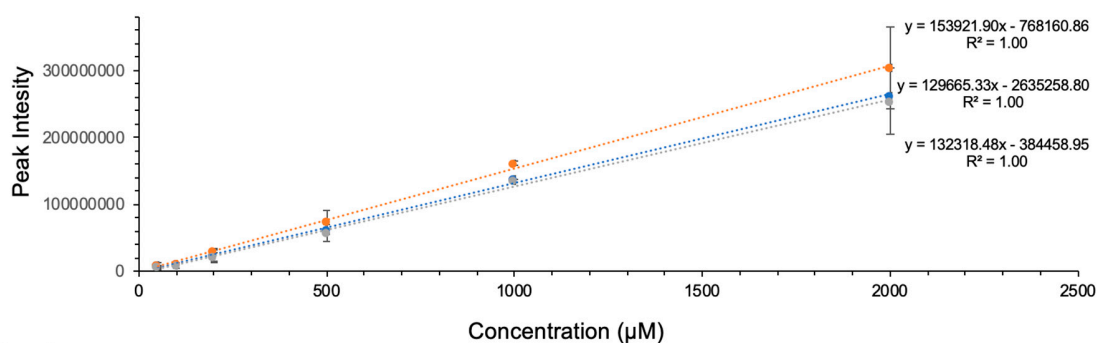

## 22. Lysine

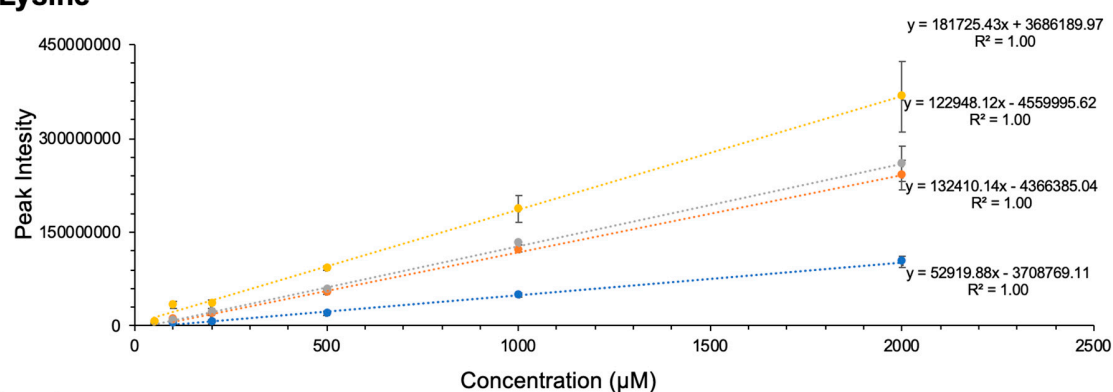

## 23. Fructose

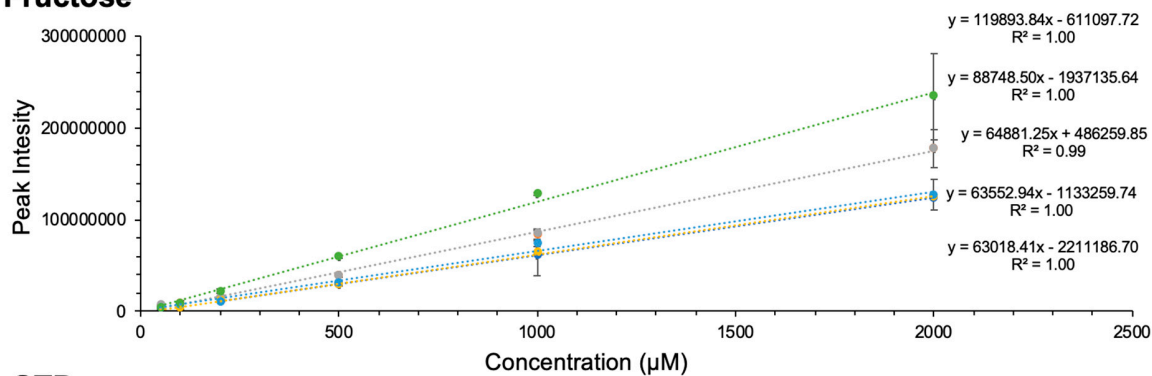

## 24. GTP

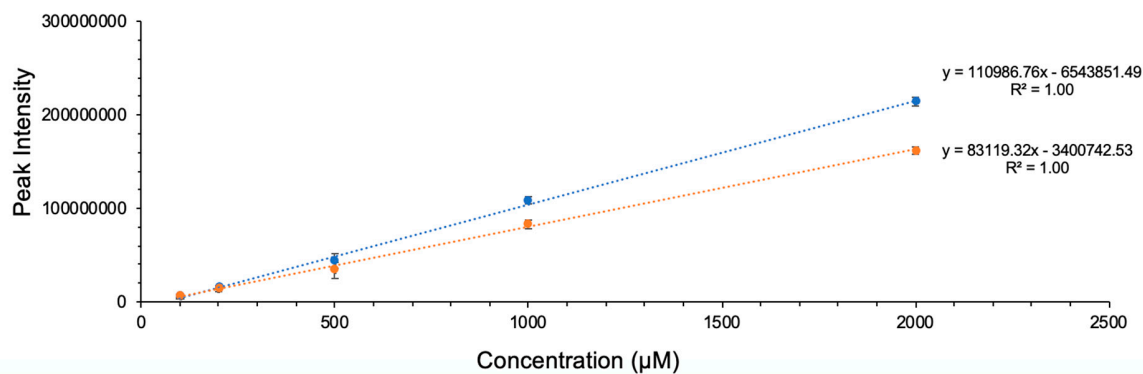

Figure S4. Linear regression curve of Reference 2 metabolites

## 25. Choline

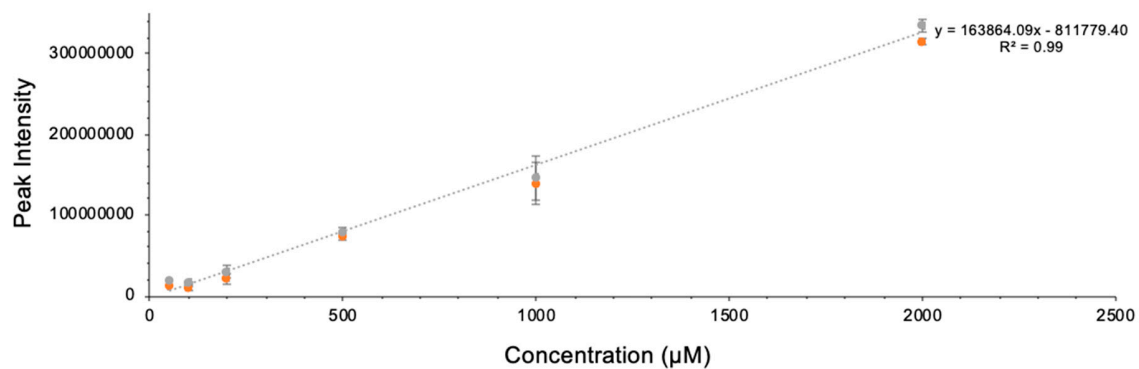

## 26. Acetyl choline

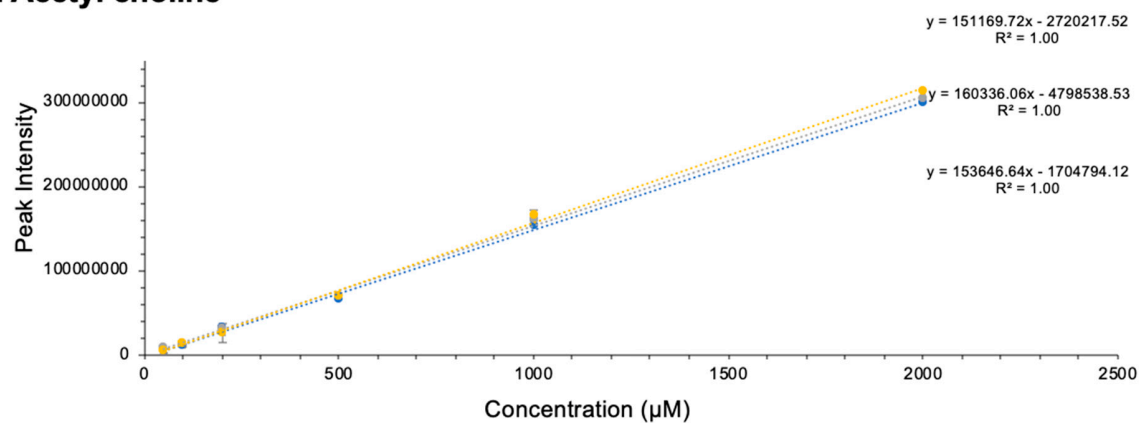

## 27. Nicotinic acid

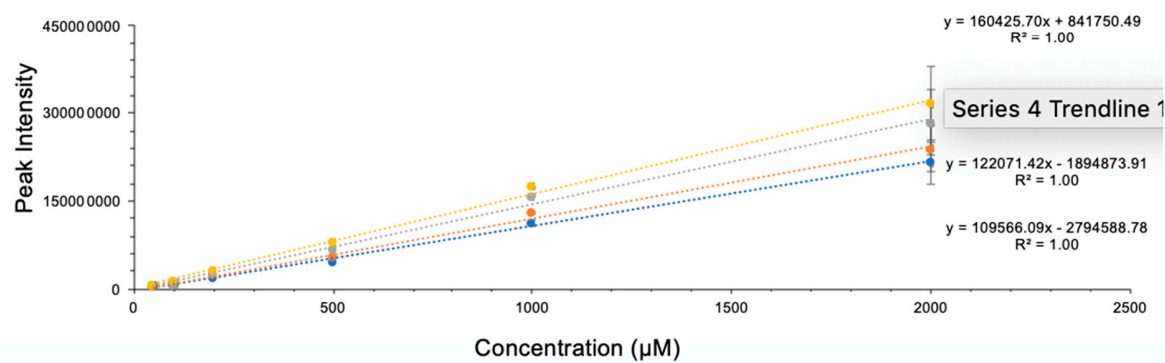

Figure S4. Linear regression curve of Reference 2 metabolites

## 28. NADPH

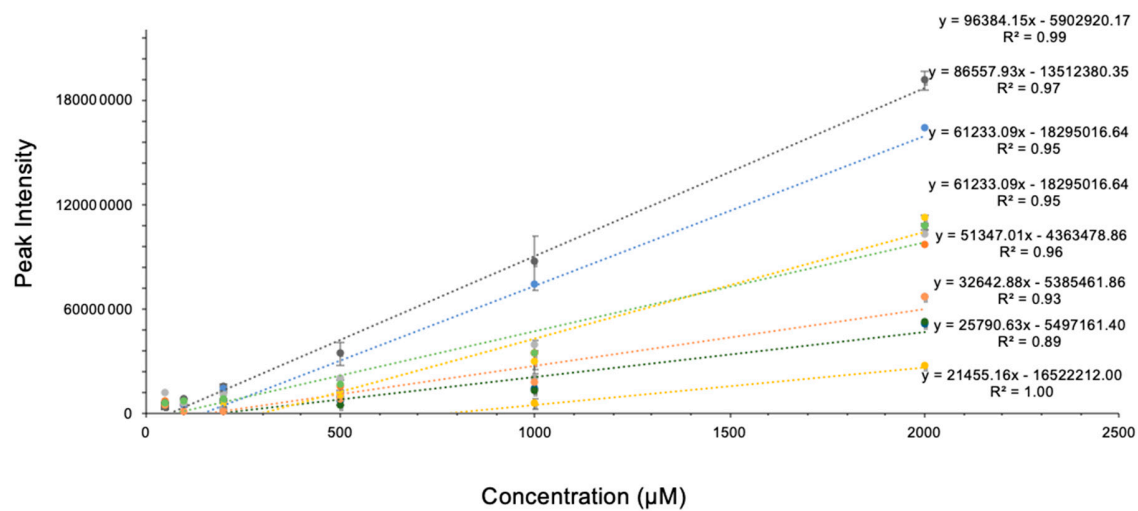

## 29. NAD

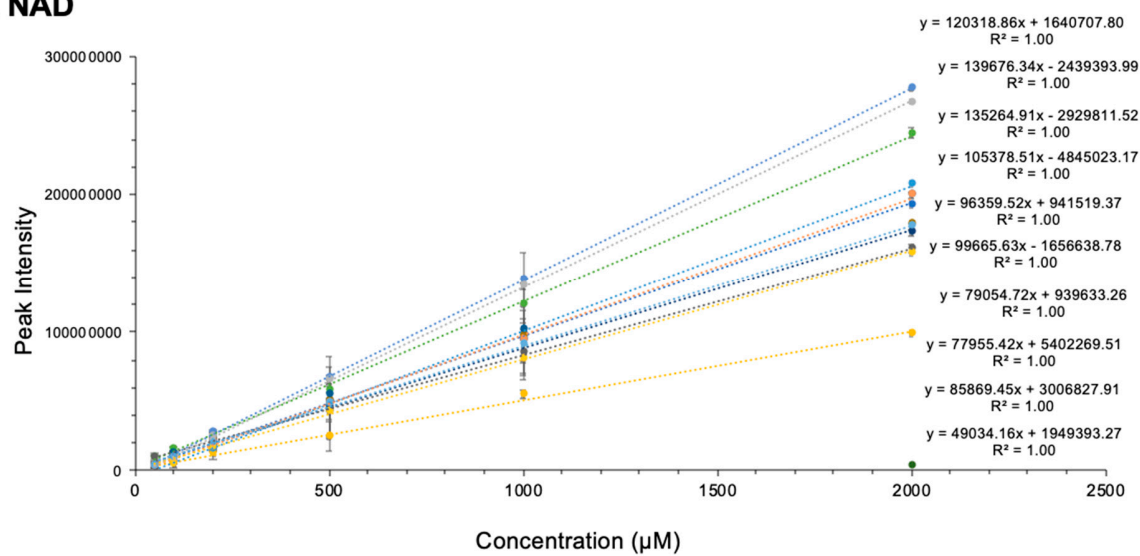

Figure S4. Linear regression curve of Reference 2 metabolites

**Table S1.** The list of metabolites in Reference 1 model mixture.

| No. | Metabolites        | Reference 1<br>Conc. ( $\mu\text{M}$ ) |
|-----|--------------------|----------------------------------------|
| 1   | Glutamic acid      | 500                                    |
| 2   | Acetylcholine      | 500                                    |
| 3   | Leucine            | 500                                    |
| 4   | Alanine            | 500                                    |
| 5   | Lysine             | 500                                    |
| 6   | Ornithine          | 500                                    |
| 7   | Arginine           | 500                                    |
| 8   | Choline            | 500                                    |
| 9   | Glutamine          | 500                                    |
| 10  | Nicotinic acid     | 500                                    |
| 11  | Succinic acid      | 500                                    |
| 12  | Acetic acid        | 500                                    |
| 13  | Lactic acid        | 500                                    |
| 14  | Malic acid         | 500                                    |
| 15  | Citric acid        | 500                                    |
| 16  | Pyruvic acid       | 500                                    |
| 17  | NADPH              | 500                                    |
| 18  | Fumaric acid       | 500                                    |
| 19  | 2-HG               | 500                                    |
| 20  | Glucose            | 500                                    |
| 21  | AMP                | 500                                    |
| 22  | NAD                | 500                                    |
| 23  | Glucosamine        | 500                                    |
| 24  | UDP                | 500                                    |
| 25  | GTP                | 500                                    |
| 26  | Ribose 5-phosphate | 500                                    |
| 27  | Histidine          | 500                                    |
| 28  | Cytidine           | 500                                    |
| 29  | Fructose           | 500                                    |

**Table S2.** The list of metabolites in Reference 2 model mixture.

| No. | Metabolites/Conc.<br>( $\mu$ M) | Std 1 | Std 2 | Std 3 | Std 4 | Std 5 | Std 6 |
|-----|---------------------------------|-------|-------|-------|-------|-------|-------|
| 1   | Glutamic acid                   | 2000  | 50    | 100   | 200   | 500   | 1000  |
| 2   | Acetylcholine                   | 100   | 200   | 500   | 1000  | 2000  | 50    |
| 3   | Leucine                         | 500   | 1000  | 2000  | 50    | 100   | 200   |
| 4   | Alanine                         | 1000  | 2000  | 50    | 100   | 200   | 500   |
| 5   | Lysine                          | 2000  | 50    | 100   | 200   | 500   | 1000  |
| 6   | Ornithine                       | 50    | 100   | 200   | 500   | 1000  | 2000  |
| 7   | Arginine                        | 100   | 200   | 500   | 1000  | 2000  | 50    |
| 8   | Choline                         | 200   | 500   | 1000  | 2000  | 50    | 100   |
| 9   | Glutamine                       | 200   | 500   | 1000  | 2000  | 50    | 100   |
| 10  | Nicotinic acid                  | 1000  | 2000  | 50    | 100   | 200   | 500   |
| 11  | Succinic acid                   | 2000  | 50    | 100   | 200   | 500   | 1000  |
| 12  | Acetic acid                     | 50    | 100   | 200   | 500   | 1000  | 2000  |
| 13  | Lactic acid                     | 100   | 200   | 500   | 1000  | 2000  | 50    |
| 14  | Malic acid                      | 200   | 500   | 1000  | 2000  | 50    | 100   |
| 15  | Citric acid                     | 500   | 1000  | 2000  | 50    | 100   | 200   |
| 16  | Pyruvic acid                    | 1000  | 2000  | 50    | 100   | 200   | 500   |
| 17  | NADPH                           | 2000  | 50    | 100   | 200   | 500   | 1000  |
| 18  | Fumaric acid                    | 50    | 100   | 200   | 500   | 1000  | 2000  |
| 19  | 2-HG                            | 100   | 200   | 500   | 1000  | 2000  | 50    |
| 20  | Glucose                         | 500   | 1000  | 2000  | 50    | 100   | 200   |
| 21  | AMP                             | 500   | 1000  | 2000  | 50    | 100   | 200   |
| 22  | NAD                             | 1000  | 2000  | 50    | 100   | 200   | 500   |
| 23  | Glucosamine                     | 50    | 100   | 200   | 500   | 1000  | 2000  |

|    |                    |      |      |      |      |      |      |
|----|--------------------|------|------|------|------|------|------|
| 24 | UDP                | 50   | 100  | 200  | 500  | 1000 | 2000 |
| 25 | GTP                | 100  | 200  | 500  | 1000 | 2000 | 50   |
| 26 | Ribose 5-phosphate | 200  | 500  | 1000 | 2000 | 50   | 100  |
| 27 | Histidine          | 500  | 1000 | 2000 | 50   | 100  | 200  |
| 28 | Cytidine           | 1000 | 2000 | 50   | 100  | 200  | 500  |
| 29 | Fructose           | 2000 | 50   | 100  | 200  | 500  | 1000 |

**Table S3:** Comparison of LOD and LOQ at 0.8 D1 and at 1.5 D1 with and without Gd respectively.

| Concentration<br>( $\mu\text{M}$ ) | TCI<br>Helium cooled |                    | TXI<br>Nitrogen cooled |
|------------------------------------|----------------------|--------------------|------------------------|
|                                    | D1= 0.8 s<br>Gd      | D1= 1.5 s<br>no Gd | D1= 1.5 s<br>no Gd     |
| LOD                                | 7.57                 | 12.61              | 19.1                   |
| LOQ                                | 26.89                | 42.03              | 65.62                  |
